# Supplementary material
Source: HighWire-hosted journal article supplement (https://jmg.bmj.com/content/jmedgenet-2021-108235)
Supplement: inline-supplementary-material-2 [file inline-supplementary-material-2.xlsx]

## Sheet: Tabelle1
Supplementary Table 2. Summary of the clinical data of all solved cases with DNAJC30 variants.
Patients	Gender	Clinical diagnosis	Variant 1	Variant 2	Origin	Age of onset (range, years)	Age of last follow-up (range, years)	Time to involvement of second eye (weeks)	Time to nadir (weeks)	VA OD at first visit (logMAR)	VA OS at first visit (logMAR)	VA OD at nadir (logMAR)	VA OS at nadir (logMAR)	VA OD at last visit (logMAR)	VA OS at last visit (logMAR)	CRR	Age of CRR (range, years)	Visual field defect	Idebenone treatment	Both eyes involved	Bilateral onset	Papillary hyperemia	Papillary atrophy	Color vision disturbance	Pain ocular movement	Peripapillary microangiopathy
LHON 59 (1316)	M	LHON	c.152A>G; p.(Tyr51Cys)	c.152A>G; p.(Tyr51Cys)	Central European	19- 29	19- 29	6	6	1.5	0	1.5	1.5	0.2	0.1	Yes	19- 29	central	No	Yes	No	Yes	Yes	unspecific	NA	Yes
LHON 59 (1824)	M	LHON	c.152A>G; p.(Tyr51Cys)	c.152A>G; p.(Tyr51Cys)	German	9- 18	19- 29	NA	NA	1.4	0.7	NA	NA	0.1	0.2	Yes	9- 18	cecocentral	No	Yes	No	Yes	Yes	unspecific	NA	Yes
LHON 84	M	LHON	c.152A>G; p.(Tyr51Cys)	c.152A>G; p.(Tyr51Cys)	Eastern European	9- 18	19- 29	NA	7	1.2	1.3	1.5	1.5	0.2	0	Yes	9- 18	cecocentral	No	Yes	Yes	Yes	temporal	tritan	No	Yes
LHON 96	M	LHON	c.152A>G; p.(Tyr51Cys)	c.610G>T; p.(Glu204*)	NA	NA	NA	NA	NA	NA	NA	NA	NA	NA	NA	NA	NA	NA	NA	NA	NA	NA	NA	NA	NA	NA
LHON 210	M	LHON	c.152A>G; p.(Tyr51Cys)	c.152A>G; p.(Tyr51Cys)	Central European	NA	NA	NA	NA	NA	NA	NA	NA	NA	NA	NA	NA	central	NA	Yes	NA	Yes	NA	NA	NA	Yes
LHON 238	F	LHON	c.152A>G; p.(Tyr51Cys)	c.152A>G; p.(Tyr51Cys)	Central European	NA	> 30	NA	NA	NA	NA	1.4	1.4	1.4	1.4	No	NA	central	NA	Yes	NA	Yes	temporal	NA	NA	NA
LHON 246	M	LHON	c.152A>G; p.(Tyr51Cys)	c.152A>G; p.(Tyr51Cys)	NA	NA	NA	NA	NA	NA	NA	NA	NA	NA	NA	NA	NA	NA	NA	NA	NA	NA	NA	NA	NA	NA
LHON 286	F	LHON	c.152A>G; p.(Tyr51Cys)	c.152A>G; p.(Tyr51Cys)	NA	NA	NA	NA	NA	NA	NA	NA	NA	NA	NA	NA	NA	NA	NA	NA	NA	NA	NA	NA	NA	NA
LHON 347	M	LHON	c.152A>G; p.(Tyr51Cys)	c.152A>G; p.(Tyr51Cys)	NA	NA	20	NA	NA	NA	NA	0.8	1.0	0.8	1.0	No	NA	cecocentral	NA	Yes	No	NA	NA	NA	NA	Yes
LHON 377	M	LHON	c.152A>G; p.(Tyr51Cys)	c.152A>G; p.(Tyr51Cys)	NA	NA	NA	NA	NA	NA	NA	NA	NA	NA	NA	NA	NA	NA	NA	NA	NA	NA	NA	NA	NA	NA
LHON 380	M	LHON	c.152A>G; p.(Tyr51Cys)	c.152A>G; p.(Tyr51Cys)	Arabic	19- 29	19- 29	NA	NA	NA	NA	1.6	1.3	1.6	1.3	No	NA	central	NA	Yes	Yes	NA	temporal	NA	NA	NA
LHON 466	M	LHON	c.152A>G; p.(Tyr51Cys)	c.152A>G; p.(Tyr51Cys)	Central European	9- 18	NA	NA	NA	NA	NA	1.5	1.2	NA	NA	NA	NA	cecocentral	NA	Yes	NA	Yes	NA	NA	NA	Yes
LHON 507	F	LHON	c.152A>G; p.(Tyr51Cys)	c.152A>G; p.(Tyr51Cys)	Central European	> 30	> 30	2	12	1.1	0.1	1.9	1.9	0.1	0.2	Yes	> 30	central	NA	Yes	No	No	temporal	unspecific defects	No	Yes
LHON 526	M	LHON	c.152A>G; p.(Tyr51Cys)	c.152A>G; p.(Tyr51Cys)	Central European	NA	19- 29	NA	NA	NA	NA	NA	NA	0.5	0.7	NA	NA	central	NA	Yes	NA	Yes	NA	NA	NA	Yes
LHON 573	M	LHON	c.152A>G; p.(Tyr51Cys)	c.610G>T; p.(Glu204*)	Central European	9- 18	19- 29	3	9	1.3	0.2	1.6	1.6	1.9	1.9	No	NA	central	No	Yes	No	No	circular	NA	No	No
LHON 582	M	LHON	c.152A>G; p.(Tyr51Cys)	c.152A>G; p.(Tyr51Cys)	Central European	9- 18	19- 29	NA	NA	1.3	1.3	1.3	1.3	0	0	Yes	9- 18	central	No	Yes	NA	NA	temporal	No	NA	Yes
LHON 600	M	LHON	c.152A>G; p.(Tyr51Cys)	c.152A>G; p.(Tyr51Cys)	Central European	NA	NA	NA	NA	NA	NA	NA	NA	NA	NA	NA	NA	NA	NA	NA	NA	NA	NA	NA	NA	NA
LHON 606	M	LHON	c.152A>G; p.(Tyr51Cys)	c.152A>G; p.(Tyr51Cys)	Central European	9- 18	NA	17	NA	1	NA	NA	NA	NA	NA	NA	NA	central	NA	Yes	No	Yes	NA	unspecific defects	NA	Yes
LHON 612	M	LHON	c.152A>G; p.(Tyr51Cys)	c.152A>G; p.(Tyr51Cys)	Central European	> 30	> 30	NA	8	1	1.4	1	1.6	1	1.5	No	NA	central	No	Yes	Yes	No	temporal	NA	No	Yes
LHON 749 (12040)	M	LHON	c.152A>G; p.(Tyr51Cys)	c.152A>G; p.(Tyr51Cys)	Central European	9- 18	19- 29	4	16	1.2	1.3	1.9	1.3	0.5	0.4	Yes	19- 29	cecocentral	No	Yes	No	No	Yes	NA	NA	NA
LHON 749 (14508)	M	LHON	c.152A>G; p.(Tyr51Cys)	c.152A>G; p.(Tyr51Cys)	Central European	9- 18	> 30	6	28	0.3	1	1.6	1.3	NA	NA	No	NA	cecocentral	No	Yes	No	Yes	Yes	NA	NA	Yes
LHON 760	M	LHON	c.152A>G; p.(Tyr51Cys)	c.152A>G; p.(Tyr51Cys)	Central European	19- 29	19- 29	3	4	0.9	0.3	1	1	0.5	0.8	Yes	19- 29	central	No	Yes	No	Yes	temporal	unspecific defects	Yes	NA
LHON 785	F	LHON	c.152A>G; p.(Tyr51Cys)	c.152A>G; p.(Tyr51Cys)	Central European	9- 18	19- 29	NA	3	1	1	1	1.3	0	0	Yes	9- 18	central	No	Yes	Yes	Yes	temporal	unspecific defects	No	Yes
LHON 895	M	LHON	c.152A>G; p.(Tyr51Cys)	c.152A>G; p.(Tyr51Cys)	Central European	> 30	NA	NA	NA	0.5	0.5	NA	NA	NA	NA	NA	NA	central	No	Yes	Yes	NA	Yes	NA	NA	NA
LHON 1076	M	LHON	c.152A>G; p.(Tyr51Cys)	c.152A>G; p.(Tyr51Cys)	Central European	9- 18	9- 18	NA	NA	0.8	0.8	0.8	0.8	0.8	0.8	No	NA	central	No	Yes	NA	NA	temporal	unspecific defects	No	NA
LHON 1088	M	LHON	c.152A>G; p.(Tyr51Cys)	c.152A>G; p.(Tyr51Cys)	Eastern European	19- 29	19- 29	1	2	1.3	0.1	1.3	NA	1.1	0.2	No	NA	cecocentral	No	Yes	No	Yes	No	unspecific	No	Yes
LHON 1089	F	LHON	c.152A>G; p.(Tyr51Cys)	c.152A>G; p.(Tyr51Cys)	Central European	19- 29	19- 29	1	NA	0.2	0.2	NA	NA	0.2	0.3	No	NA	cecocentral	No	Yes	No	No	No	unspecific defects	No	Yes
LHON 1129	M	LHON	c.152A>G; p.(Tyr51Cys)	c.152A>G; p.(Tyr51Cys)	Central European	19- 29	NA	9	NA	0.1	1.3	NA	NA	NA	NA	NA	NA	central	No	Yes	No	NA	temporal	No	No	NA
LHON 1149	M	LHON	c.152A>G; p.(Tyr51Cys)	c.610G>T; p.(Glu204*)	Central European	NA	NA	NA	NA	1.3	1.3	NA	NA	NA	NA	NA	NA	superior > inferior	NA	NA	NA	NA	temporal	NA	NA	NA
OAK 317	M	OA	c.152A>G; p.(Tyr51Cys)	c.152A>G; p.(Tyr51Cys)	Central European	NA	NA	NA	NA	NA	NA	NA	NA	NA	NA	NA	NA	NA	NA	NA	NA	NA	NA	NA	NA	NA
OAK 559 (19776)	M	OA	c.230_232del; p.(His77del)	c.230_232del;p.(His77del)	Turkish	9- 18	NA	NA	NA	0.3	0.5	NA	NA	NA	NA	NA	NA	cecocentral	No	Yes	NA	NA	circular	NA	No	NA
OAK 559 (31530)	M	OA	c.230_232del;p.(His77del)	c.230_232del;p.(His77del)	Turkish	9- 18	> 30	NA	NA	1	0.7	1	0.7	0.8	0.7	NA	NA	central	No	Yes	NA	NA	temporal	unspecific	No	NA
OAK 627	M	DOA	c.152A>G; p.(Tyr51Cys)	c.152A>G; p.(Tyr51Cys)	Central European	9- 18	19- 29	NA	4	1	1.3	1	1.3	0.8	1.0	No	NA	cecocentral	No	Yes	Yes	NA	temporal	tritan	No	NA
OAK 715	M	OA	c.152A>G; p.(Tyr51Cys)	c.152A>G; p.(Tyr51Cys)	Central European	9- 18	19- 29	NA	NA	0.9	0.2	NA	NA	0.6	0.2	No	NA	cecocentral	No	Yes	Yes	NA	temporal	protan/deutan	No	NA
OAK 767	M	DOA	c.152A>G; p.(Tyr51Cys)	c.152A>G; p.(Tyr51Cys)	Central European	9- 18	19- 29	NA	26	0.2	0.1	1.3	1	0.2	0	Yes	9- 18	cecocentral	Yes (6 months)	Yes	Yes	NA	temporal	unspecific	No	Yes
Abbreviations: M, male; F, female; LHON, Leber´s hereditary optic neuropathy; OAK, optic atrophy/Kjer type; OA, optic atrophy; DOA, dominant optic atrophy; VA, visual acuity; OD, right eye; OS, left eye; CRR, clinically relevant recovery; NA, not available.
